# Supplementary material for: Insights into the catalytic activity of boron-doped thiazoles in the Diels–Alder reaction
Source: Royal Society of Chemistry journal article supplement (doi:10.1039/d3cp02441e), 2023-01-01
Supplement: d3cp02441e1.pdf [file d3cp02441e1.pdf]

## Insights into the catalytic activity of boron doped thiazoles in Diels-Alder reaction

Swapan Sinha<sup>1,2</sup>, Abhishek Das<sup>1</sup>, Santanab Giri<sup>1\*</sup>

<sup>1</sup> School of Applied Science and Humanities, Haldia Institute of Technology, ICARE Complex, West Bengal 721657, India.

<sup>2</sup> Maulana Abul Kalam Azad University of Technology, Haringhata, 741249, India.

\*Corresponding author email: [santanab.giri@gmail.com](mailto:santanab.giri@gmail.com)

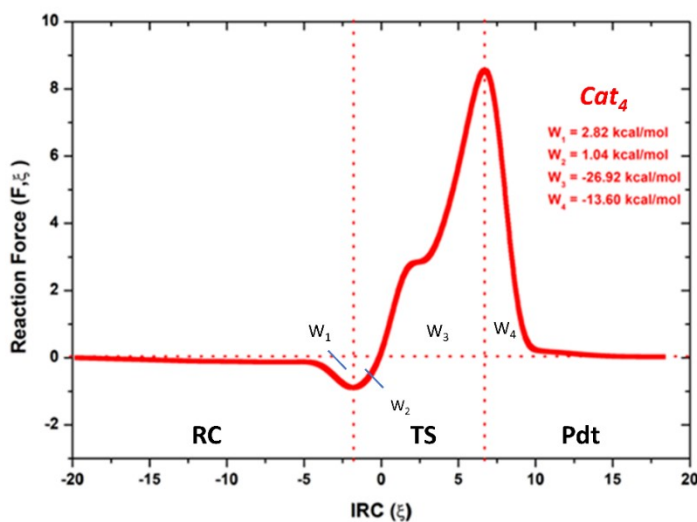

Figure S1: The reaction force profile along with IRC of Reaction 5 in presence  $Cat_4$ . (Where red dotted lines separated the reaction profile with three regions i.e., reactant complex (RC), transition state (TS) and product (Pdt)).

Table S1: Calculated hardness, electrophilicity for individual reactant and product along with  $\Delta\eta$ ,  $\Delta\omega$  of our studied reactions (in eV unit).

| Reactions                        | Hardness ( $\eta$ , eV) |         | Electrophilicity ( $\omega$ , eV) |         | $\Delta\eta$ | $\Delta\omega$ |
|----------------------------------|-------------------------|---------|-----------------------------------|---------|--------------|----------------|
|                                  | Reactant                | Product | Reactant                          | Product |              |                |
| Reaction-1<br>(Without catalyst) | 7.264                   | 8.847   | 1.311                             | 0.850   | 1.583        | -0.461         |
| Reaction-2<br>( $BF_3/Cat_1$ )   | 5.919                   | 7.320   | 2.307                             | 1.710   | 1.401        | -0.309         |
| Reaction-3<br>( $Cat_2$ )        | 3.650                   | 4.404   | 2.039                             | 1.439   | 0.754        | -0.685         |
| Reaction-4<br>( $Cat_3$ )        | 3.675                   | 4.501   | 2.585                             | 1.792   | 0.826        | -0.966         |
| Reaction-5<br>( $Cat_4$ )        | 4.007                   | 4.215   | 3.295                             | 3.126   | 0.208        | -2.918         |

## Calculated Hirschfield charges of *Cat2-Cat4*

### *Cat2*

**Atom 1(B): 0.12258249**  
Atom 2(N): -0.23354058  
Atom 3(S): 0.00984371  
Atom 4(C): 0.03916888  
Atom 5(C): -0.00750246  
Atom 6(H): -0.04649601  
Atom 7(H): 0.05448844  
Atom 8(H): 0.06145553

### *Cat3*

**Atom 1(B): 0.23751472**  
Atom 2(N): -0.24811939  
Atom 3(S): 0.01804743  
Atom 4(C): 0.16299239  
Atom 5(C): 0.10136857  
Atom 6(F): -0.06066222  
Atom 7(F): -0.07664482  
Atom 8(F): -0.13449668

### *Cat4*

**Atom 1(B): 0.25585645**  
Atom 2(N): -0.20195685  
Atom 3(S): 0.07780713  
Atom 4(C): 0.10670277  
Atom 5(C): 0.03329478  
Atom 6(C): 0.07198360  
Atom 7(N): -0.14484069  
Atom 8(C): 0.05968041  
Atom 9(N): -0.13898099  
Atom 10(F): -0.11954662

### Cartesian Coordinates of TS (Reaction 1 i.e., Without Catalyst)

Standard orientation:

| Center<br>Number | Atomic<br>Number | Atomic<br>Type | Coordinates (Angstroms) |           |           |
|------------------|------------------|----------------|-------------------------|-----------|-----------|
|                  |                  |                | X                       | Y         | Z         |
| 1                | 6                | 0              | -1.959537               | 0.446288  | 0.127071  |
| 2                | 6                | 0              | -0.863690               | 0.017554  | 0.995800  |
| 3                | 6                | 0              | -0.336358               | -1.251486 | 0.821385  |
| 4                | 1                | 0              | -0.643400               | 0.607890  | 1.874949  |
| 5                | 1                | 0              | 0.269632                | -1.690308 | 1.602998  |
| 6                | 1                | 0              | -0.912568               | -1.943673 | 0.217132  |
| 7                | 8                | 0              | -2.259157               | -0.120287 | -0.902723 |
| 8                | 1                | 0              | -2.502353               | 1.359005  | 0.442022  |
| 9                | 6                | 0              | 2.058813                | -0.367647 | -0.177534 |
| 10               | 6                | 0              | 1.795919                | 0.991842  | 0.079906  |
| 11               | 6                | 0              | 0.606582                | 1.573152  | -0.260055 |
| 12               | 6                | 0              | 1.094420                | -1.207472 | -0.696498 |
| 13               | 1                | 0              | 2.966981                | -0.801662 | 0.228400  |
| 14               | 1                | 0              | 2.493057                | 1.539713  | 0.705639  |
| 15               | 1                | 0              | 0.375767                | 2.582834  | 0.060533  |
| 16               | 1                | 0              | 1.326557                | -2.258733 | -0.825127 |
| 17               | 1                | 0              | 0.321176                | -0.829828 | -1.357668 |
| 18               | 1                | 0              | 0.001518                | 1.183671  | -1.067547 |

### Cartesian Coordinates of TS (Reaction 2 i.e., $\text{BF}_3/\text{Cat}_1$ Catalyst)

Standard orientation:

| Center<br>Number | Atomic<br>Number | Atomic<br>Type | Coordinates (Angstroms) |           |           |
|------------------|------------------|----------------|-------------------------|-----------|-----------|
|                  |                  |                | X                       | Y         | Z         |
| 1                | 6                | 0              | 0.390921                | -1.214539 | 1.157757  |
| 2                | 6                | 0              | -0.644004               | -0.308486 | 1.463886  |
| 3                | 6                | 0              | -0.735364               | 1.059272  | 1.204828  |
| 4                | 1                | 0              | -1.433207               | -0.766120 | 2.048841  |
| 5                | 1                | 0              | -1.394891               | 1.625926  | 1.850112  |
| 6                | 1                | 0              | 0.131129                | 1.590682  | 0.831992  |
| 7                | 8                | 0              | 1.458100                | -1.094130 | 0.497753  |
| 8                | 1                | 0              | 0.264600                | -2.211718 | 1.589004  |
| 9                | 5                | 0              | 1.963952                | 0.129738  | -0.318013 |
| 10               | 9                | 0              | 0.920056                | 0.433137  | -1.204254 |
| 11               | 9                | 0              | 3.082864                | -0.297891 | -0.951198 |
| 12               | 9                | 0              | 2.173165                | 1.163393  | 0.570599  |
| 13               | 6                | 0              | -2.919522               | 0.623895  | -0.408132 |
| 14               | 6                | 0              | -2.851734               | -0.787115 | -0.549642 |
| 15               | 6                | 0              | -1.691414               | -1.445524 | -0.805318 |
| 16               | 6                | 0              | -1.820445               | 1.451323  | -0.499570 |
| 17               | 1                | 0              | -3.863244               | 1.045503  | -0.073196 |
| 18               | 1                | 0              | -3.747702               | -1.358215 | -0.329919 |
| 19               | 1                | 0              | -1.667469               | -2.529527 | -0.812094 |
| 20               | 1                | 0              | -1.969426               | 2.518090  | -0.376552 |
| 21               | 1                | 0              | -0.963010               | 1.164681  | -1.095480 |

22            1            0            -0.796737    -0.935661    -1.143842

---

### Cartesian Coordinates of TS (Reaction 3 i.e., *Cat*<sub>2</sub> Catalyst)

Standard orientation:

---

| Center<br>Number | Atomic<br>Number | Atomic<br>Type | Coordinates (Angstroms) |           |           |
|------------------|------------------|----------------|-------------------------|-----------|-----------|
|                  |                  |                | X                       | Y         | Z         |
| 1                | 6                | 0              | -0.551645               | -1.297390 | 1.292546  |
| 2                | 6                | 0              | -1.558441               | -0.333960 | 1.485162  |
| 3                | 6                | 0              | -1.498249               | 1.037679  | 1.212962  |
| 4                | 1                | 0              | -2.425108               | -0.727677 | 2.002671  |
| 5                | 1                | 0              | -2.232982               | 1.656641  | 1.714711  |
| 6                | 1                | 0              | -0.512923               | 1.473457  | 1.024911  |
| 7                | 8                | 0              | 0.542691                | -1.272343 | 0.663328  |
| 8                | 1                | 0              | -0.734504               | -2.260211 | 1.779414  |
| 9                | 6                | 0              | -3.243352               | 0.961228  | -0.785177 |
| 10               | 6                | 0              | -3.526690               | -0.429765 | -0.858679 |
| 11               | 6                | 0              | -2.559889               | -1.378900 | -0.899056 |
| 12               | 6                | 0              | -1.968843               | 1.481530  | -0.687637 |
| 13               | 1                | 0              | -4.084964               | 1.632226  | -0.637395 |
| 14               | 1                | 0              | -4.562813               | -0.735981 | -0.760489 |
| 15               | 1                | 0              | -2.816128               | -2.430834 | -0.846124 |
| 16               | 1                | 0              | -1.848304               | 2.558121  | -0.652185 |
| 17               | 1                | 0              | -1.110645               | 0.948480  | -1.076617 |
| 18               | 1                | 0              | -1.525613               | -1.142076 | -1.118350 |
| 19               | 5                | 0              | 1.152551                | -0.264370 | -0.345870 |
| 20               | 7                | 0              | 1.267993                | 1.126464  | 0.181229  |
| 21               | 16               | 0              | 3.011301                | -0.875512 | -0.642392 |
| 22               | 6                | 0              | 2.499490                | 1.544501  | 0.227181  |
| 23               | 6                | 0              | 3.548340                | 0.675446  | -0.161226 |
| 24               | 1                | 0              | 2.732116                | 2.553873  | 0.569696  |
| 25               | 1                | 0              | 4.597873                | 0.934583  | -0.157479 |
| 26               | 1                | 0              | 0.518621                | -0.399272 | -1.366825 |

---

### Cartesian Coordinates of TS (Reaction 4 i.e., *Cat*<sub>3</sub> Catalyst)

Standard orientation:

---

| Center<br>Number | Atomic<br>Number | Atomic<br>Type | Coordinates (Angstroms) |           |           |
|------------------|------------------|----------------|-------------------------|-----------|-----------|
|                  |                  |                | X                       | Y         | Z         |
| 1                | 6                | 0              | -1.169246               | -0.935214 | 1.667553  |
| 2                | 6                | 0              | -2.047272               | 0.150557  | 1.592433  |
| 3                | 6                | 0              | -1.854095               | 1.385690  | 0.971200  |
| 4                | 1                | 0              | -2.948673               | 0.001412  | 2.174702  |
| 5                | 1                | 0              | -2.496972               | 2.195254  | 1.294527  |
| 6                | 1                | 0              | -0.856593               | 1.654653  | 0.627614  |
| 7                | 8                | 0              | -0.062892               | -1.196080 | 1.094688  |
| 8                | 1                | 0              | -1.461370               | -1.718832 | 2.370660  |
| 9                | 6                | 0              | -3.776842               | 1.011202  | -0.864298 |
| 10               | 6                | 0              | -4.201980               | -0.333717 | -0.616799 |
| 11               | 6                | 0              | -3.354827               | -1.382030 | -0.543161 |
| 12               | 6                | 0              | -2.471395               | 1.399986  | -1.022306 |
| 13               | 1                | 0              | -4.539547               | 1.783626  | -0.807238 |
| 14               | 1                | 0              | -5.254273               | -0.487002 | -0.401501 |

---

|    |    |   |           |           |           |
|----|----|---|-----------|-----------|-----------|
| 15 | 1  | 0 | -3.725317 | -2.366565 | -0.281347 |
| 16 | 1  | 0 | -2.259799 | 2.441589  | -1.234595 |
| 17 | 1  | 0 | -1.698864 | 0.694757  | -1.305689 |
| 18 | 1  | 0 | -2.309604 | -1.307403 | -0.820876 |
| 19 | 5  | 0 | 0.606424  | -0.536505 | -0.100401 |
| 20 | 7  | 0 | 0.970978  | 0.887961  | 0.117118  |
| 21 | 16 | 0 | 2.309803  | -1.555817 | -0.354246 |
| 22 | 6  | 0 | 2.231145  | 1.053617  | 0.050027  |
| 23 | 6  | 0 | 3.092272  | -0.049305 | -0.185857 |
| 24 | 9  | 0 | 2.800757  | 2.251962  | 0.196151  |
| 25 | 9  | 0 | 4.407071  | 0.093798  | -0.276171 |
| 26 | 9  | 0 | -0.254299 | -0.764394 | -1.177359 |

### Cartesian Coordinates of TS (Reaction 5 i.e., *Cat<sub>4</sub>* Catalyst)

Standard orientation:

| Center<br>Number | Atomic<br>Number | Atomic<br>Type | Coordinates (Angstroms) |           |           |
|------------------|------------------|----------------|-------------------------|-----------|-----------|
|                  |                  |                | X                       | Y         | Z         |
| 1                | 6                | 0              | -1.531937               | -0.714078 | 1.723367  |
| 2                | 6                | 0              | -2.323023               | 0.419762  | 1.520769  |
| 3                | 6                | 0              | -2.074325               | 1.525039  | 0.710618  |
| 4                | 1                | 0              | -3.207662               | 0.430010  | 2.146257  |
| 5                | 1                | 0              | -2.633245               | 2.425977  | 0.930423  |
| 6                | 1                | 0              | -1.091453               | 1.658549  | 0.267002  |
| 7                | 8                | 0              | -0.462417               | -1.132082 | 1.167507  |
| 8                | 1                | 0              | -1.859338               | -1.375546 | 2.527788  |
| 9                | 6                | 0              | -4.183285               | 0.977978  | -0.924700 |
| 10               | 6                | 0              | -4.612702               | -0.309630 | -0.463922 |
| 11               | 6                | 0              | -3.782809               | -1.361644 | -0.304307 |
| 12               | 6                | 0              | -2.891040               | 1.301191  | -1.240357 |
| 13               | 1                | 0              | -4.925646               | 1.771771  | -0.920331 |
| 14               | 1                | 0              | -5.650070               | -0.403958 | -0.160807 |
| 15               | 1                | 0              | -4.152231               | -2.293572 | 0.108270  |
| 16               | 1                | 0              | -2.673962               | 2.298516  | -1.604557 |
| 17               | 1                | 0              | -2.157948               | 0.538950  | -1.472956 |
| 18               | 1                | 0              | -2.756639               | -1.351093 | -0.653328 |
| 19               | 5                | 0              | 0.246130                | -0.640798 | -0.069279 |
| 20               | 7                | 0              | 0.797100                | 0.740377  | 0.068594  |
| 21               | 16               | 0              | 1.837544                | -1.826568 | -0.269585 |
| 22               | 6                | 0              | 2.077721                | 0.779537  | 0.010999  |
| 23               | 6                | 0              | 2.829702                | -0.446155 | -0.162653 |
| 24               | 6                | 0              | 2.789372                | 2.040816  | 0.116172  |
| 25               | 7                | 0              | 3.344968                | 3.042469  | 0.199876  |
| 26               | 6                | 0              | 4.236229                | -0.493604 | -0.235656 |
| 27               | 7                | 0              | 5.388653                | -0.531120 | -0.293737 |
| 28               | 9                | 0              | -0.638032               | -0.810137 | -1.130353 |
